# Supplementary material for: The association between academic pressure and adolescent mental health problems: A systematic review
Source: medRxiv preprint, doi:10.1101/2023.01.24.23284938, version 1 (2023-01-24)
Supplement: . Full search terms are available in the appendix. [file 284938_file02.docx]

**Search terms**

Medline (OVID) (between 1946 and Nov 24, 2022)

| 1 | Schools/ |
| --- | --- |
| 2 | Education/ |
| 3 | (educat* or school*).ti,ab,kf,kw. |
| 4 | 1 or 2 or 3 |
| 5 | (pressure* or stress* or worry or worrie? or anxi* adj2 (exam? or examination? or school? or grade* or deadline? or assignment? or mark? or test? or educat* or academic*)).ti,ab,kf,kw. |
| 6 | (pressure* or demand* adj1 (exam? or examination? or school? or teacher? or parent* or academic*)).ti,ab,kf,kw. |
| 7 | ((fail* or pass) adj2 (school* or exam? or examination? or assignment* or mark? or fear* or grade? or test? or coursework)).ti,ab,kf,kw. |
| 8 | academic* adj1 (hardiness* or buoyan* or resilien*).ti,ab,kf,kw. |
| 9 | (school* adj1 (homework*or demand* or burnout*)).ti,ab,kf,kw. |
| 10 | (school work or school-work or schoolwork or high stakes).ti,ab,kf,kw. |
| 11 | (accountab* adj (regime? or system or systems or school? or educat* or teach* or policy or policies)).ti,ab,kf,kw. |
| 12 | 5 or 6 or 7 or 8 or 9 or 10 or 11 |
| 13 | mental disorders/ or anxiety disorders/ or agoraphobia/ or neurotic disorders/ or obsessive-compulsive disorder/ or panic disorder/ or phobic disorders/ or phobia, social/ or mood disorders/ or depressive disorder/ or depressive disorder, major/ or depressive disorder, treatment-resistant/ or dysthymic disorder/ or depression/ or cyclothymic disorder/ or adjustment disorders/ or Mental Health/ or self-injurious behavior/ or self mutilation/ or suicide/ or suicidal ideation/ or suicide, attempted/ |
| 14 | (mental* or psychiatr*) adj2 (health* or ill* or disorder* or diagnos?s or problem*).ti,ab,kf,kw |
| 15 | (mental health services/ or community mental health services/ or community psychiatry/ or Emergency Services, Psychiatric/ or adolescent health services/ or counseling/ or school mental health services/) |
| 16 | (CAMHS or adolescent mental health service*).ti,ab,kf,kw. |
| 17 | (affective disorder* or agoraphobi* or anxiety or GAD or cyclothymi* or depressed or depression or depressive or MDD or mood disorder* or obsessive compulsive disorder* or OCD or panic or parasuicid* or phobi* or adjustment disorder* or dysthymi* or (self adj1 (injur* or harm or mutilat*)) or suicid*).ti,ab,kf,kw. |
| 18 | 13 or 14 or 15 or 16 or 17 |
| 19 | Child/ or Adolescent/ or Students/ |
| 20 | (pupil? or student? or child* or adolescen* or teenager* or youth?).ti,ab,kf,kw. |
| 21 | 19 or 20 |
| 22 | 4 and 12 and 18 and 21 |

PsycINFO (OVID) (between 1806 and Nov 24, 2022)

| 1 | Schools/ |
| --- | --- |
| 2 | Education/ |
| 3 | (educat* or school*).ti,ab,hw,id. |
| 4 | 1 or 2 or 3 |
| 5 | (pressure* or stress* or worry or worrie? or anxi* adj2 (exam? or examination? or school? or grade* or deadline? or assignment? or mark? or test* or educat* or academic*)).ti,ab,hw,id. |
| 6 | pressure* or demand* adj1 (exam? or examination? or school? or teacher? or parent* or academic*)).ti,ab,hw,id. |
| 7 | ((fail* or pass) adj2 (school* or exam? or examination? or assignment* or mark? or fear* or grade? or test? or coursework)).ti,ab,hw,id. |
| 8 | academic* adj1 (hardiness* or buoyan* or resilien*).ti,ab,hw,id. |
| 9 | (school* adj1 (homework*or demand* or burnout*)).ti,ab,hw,id. |
| 10 | (school work or school-work or schoolwork or high stakes).ti,ab,hw,id. |
| 11 | (accountab* adj1 (regime? or system or systems or school? or educat* or teach* or policy or policies)).ti,ab,hw,id. |
| 12 | 5 or 6 or 7 or 8 or 9 or 10 or 11 |
| 13 | mental disorders/ or anxiety disorders/ or agoraphobia/ or obsessive-compulsive disorder/ or panic disorder/ or mood disorders/ or dysthymic disorder/ or depression/ or cyclothymic disorder/ or adjustment disorders/ or Mental Health/ self-injurious behavior/ or self mutilation/ or suicide/ or suicidal ideation/ or suicide, attempted/ |
| 14 | (mental* or psychiatr*) adj2 (health* or ill* or disorder* or diagnos?s or problem*).ti,ab,hw,id. |
| 15 | mental health services/ or community mental health services/ or community psychiatry/ or counseling/ |
| 16 | (emergency psychiatr* or adolescent health service* or school mental health service* or CAMHS or adolescent mental health service*).ti,ab,hw,id. |
| 17 | (affective disorder* or agoraphobi* or anxiety or GAD or cyclothymi* or depressed or depression or depressive or MDD or mood disorder* or obsessive compulsive disorder* or OCD or panic or parasuicid* or phobi* or adjustment disorder* or dysthymi* or (self adj (injur* or harm or mutilat*)) or suicid*).ti,ab,hw,id. |
| 18 | 13 or 14 or 15 or 16 or 17 |
| 19 | Early Adolescence/ or Primary School Students/ or Students/ or Junior High School Students/ or High School Students/ or Middle School Students/ or Primary School Students/ or Intermediate School Students/ or Education Students/ or Students/ or Elementary School Students/ |
| 20 | (pupil? or student? or child* or adolescen* or teenager* or youth?).ti,ab,hw,id. |
| 21 | 19 or 20 |
| 22 | 4 and 12 and 18 and 21 |

ERIC (ProQuest) (between 1966 and Nov 24, 2022)

| 1 | Schools (DE) |
| --- | --- |
| 2 | Education (DE) |
| 3 | School* or educat* |
| 4 | 1 or 2 or 3 |
| 5 | ((pressure* or stress* or worry or worrie? or anxi*) n2 (exam? or examination? or school? or grade* or deadline? or assignment? or mark? or test* or educat* or academic*)) |
| 6 | ((pressure* or demand*) n1 (exam? or examination? or school? or teacher? or parent* or academic*)) |
| 7 | ((fail* or pass) n2 (school* or exam? or examination? or assignment* or mark? or fear* or grade? or test? or coursework)) |
| 8 | academic* n1 (hardiness* or buoyan* or resilien*) |
| 9 | (school* n1 (homework*or demand* or burnout*)) |
| 10 | (“School work” or school-work or schoolwork or “high stakes”) |
| 11 | (accountab* n1 (regime? or system or systems or school? or educat* or teach* or policy or policies)) |
| 12 | 5 or 6 or 7 or 8 or 9 or 10 or 11 |
| 13 | mental disorders/ or anxiety disorders/or depression/ or Mental Health or Self destructive behavior or Suicide (DE) |
| 14 | (mental* or psychiatr*) n2 (health* or ill* or disorder* or diagnos?s or problem*) |
| 15 | Psychiatric services or Mental Health Programs or Psychiatry (DE) |
| 16 | (counsel?ing or “mental health service*” or “emergency psychiatr*” or “community psychiatr*” or “adolescent health service*” or “school mental health service*” or CAMHS or “adolescent mental health service*” |
| 17 | “affective disorder*” or agoraphobi* or anxiety or GAD or cyclothymi* or depressed or depression or depressive or MDD or “mood disorder*” or “obsessive compulsive disorder*” or OCD or panic or parasuicid* or phobi* or dysthymi* or “adjustment disorder*” or (self n1 (injur* or harm or mutilat*)) or suicid*) |
| 18 | 13 or 14 or 15 or 16 or 17 |
| 19 | pupil? or student? or child* or adolescen* or teenager* or youth? |
| 20 | 4 and 12 and 18 and 19 |

Web of Science Core Collection (between 1900 and Nov 24, 2022)

| 1 | TOPIC: (educat* or school*) |
| --- | --- |
| 2 | TOPIC: ((pressure* or stress* or worry or worrie? or anxi*) "NEAR/2" (exam? or examination? or school? Or grade* or deadline? or assignment? or mark? or test* or educat* or academic*)) OR TOPIC: ((pressure* or demand*) "NEAR/1" (exam? or examination? or school? or teacher? or parent* or academic*)) OR TOPIC: ((fail* or pass) "NEAR/2" (school* or exam* or assignment* or mark* or fear* or grade* or test* or coursework)) OR TOPIC: ((academic*) "NEAR/1" (hardiness* or buoyan* or resilien*)) OR TOPIC: (((school*) "NEAR/2" (homework*or demand* or burnout*))) OR TOPIC: (("School work" or school-work or schoolwork or high stakes)) OR TOPIC: (((accountab* ) "NEAR/1" (regime? or system or systems or school? or educat* or teach* or policy or policies))) |
| 3 | TOPIC: ((mental* or psychiatr*) "NEAR/2 "(health* or ill* or disorder* or diagnos?s or problem*)) OR TOPIC: (“mental health service*” or “emergency psychiatr*” or “community psychiatr*” or “adolescent health service*” or “school mental health service*” or CAMHS or “adolescent mental health service*” or counsel?ing) OR TOPIC: ((“affective disorder*” or agoraphobi* or anxiety or GAD or cyclothymi* or depressed or depression or depressive or MDD or “mood disorder*” or “obsessive compulsive disorder*” or OCD or panic or parasuicid* or phobi* or dysthymi* or “adjustment disorder*” or (self NEAR/1 (injur* or harm or mutilat*)) or suicid*)) |
| 4 | TOPIC: (pupil or student* or child* or adolescen* or teenager* or youth*) |
| 5 | 1 and 2 and 3 and 4 |

**List of studies excluded after full-text assessment**

| **First author, year** | **Reason** | **Author communication** |
| --- | --- | --- |
| (Addy et al., 2021) | No exposures of interest |  |
| (Ali et al., 2019) | No outcomes of interest |  |
| (Anniko et al., 2019) | Excluded study design |  |
| (Arthur, 1990) | Full-text inaccessible |  |
| (Arun et al., 2017) | Excluded study design |  |
| (Askell-Williams and Lawson, 2015) | No exposures of interest |  |
| (Assana et al., 2017) | Excluded study design |  |
| (Bashir et al., 2019) | No exposures of interest |  |
| (Beer, 1991) | No exposures of interest |  |
| (Beidel and Turner, 1988) | No exposures of interest |  |
| (Beidel et al., 1994) | No exposures of interest |  |
| (Belhadj Kouider et al., 2015) | Not in English |  |
| (Bourion-Bédès et al., 2022) | No exposures of interest |  |
| (Buddeberg-Fischer et al., 2000) | Not in English |  |
| (Chen, 2018) | Unpublished thesis |  |
| (Chiou et al., 2006) | Excluded study design |  |
| (Cho, 2020) | No exposures of interest | Contacted (no response) |
| (Chusid, 2020) | Unpublished thesis |  |
| (Deng et al., 2022) | Excluded study population |  |
| (Ding, 2002) | Not in English |  |
| (Einstein et al., 2000) | No exposures of interest |  |
| (Elmelid et al., 2015) | No exposures of interest |  |
| (Ertanir et al., 2021) | Excluded study design |  |
| (Fernández-Sogorb et al., 2021) | No outcomes of interest |  |
| (Feurer and Andrews, 2009) | No exposures of interest |  |
| (Friis et al., 2002) | Excluded study population |  |
| (Giota and Gustafsson, 2017) | Excluded study design |  |
| (Govorova et al., 2020) | No outcomes of interest |  |
| (Guiping and Huichang, 2001) | Not in English |  |
| (Högberg et al., 2019) | Excluded study design |  |
| (Högberg et al., 2021) | Excluded study design |  |
| (Hou and Chen, 2016) | Not in English |  |
| (Huang et al., 2009) | No exposures of interest |  |
| (Ishizu, 2017) | No exposures of interest |  |
| (Jerrim, 2021) | No outcomes of interest |  |
| (Julien, 2020) | Unpublished thesis |  |
| (Kaya, 2004) | No exposures of interest |  |
| (Khan et al., 2022) | No outcomes of interest |  |
| (Khanehheshi and Basavarajappa, 2012) | Excluded study design |  |
| (Kim et al., 2018) | No exposures of interest | Contacted (no response) |
| (Kim, 2021) | Excluded study design |  |
| (Kim et al., 2021) | No exposures of interest |  |
| (Koyama et al., 2014) | No exposures of interest |  |
| (Kwon et al., 2015) | No exposures of interest |  |
| (Lazaratou et al., 2010) | No exposures of interest |  |
| (Lee et al., 2006) | No exposures of interest |  |
| (Lee, 2016) | No exposures of interest | Contacted (no response) |
| (Lee et al., 2021) | Excluded study design |  |
| (Li et al., 2021) | Excluded study design |  |
| (Lin and Yusoff, 2013) | Excluded study population |  |
| (Little and Garber, 2004) | No exposures of interest |  |
| (Luo et al., 2020) | Excluded study design |  |
| (Luthar et al., 2021) | No exposures of interest |  |
| (Mardomingo Sanz and Catalina Zamora, 1992) | Not in English |  |
| (Martinez and Bámaca-Colbert, 2019) | No exposures of interest |  |
| (Masi et al., 2000) | No exposures of interest |  |
| (E. M. McMahon et al., 2010) | No exposures of interest |  |
| (Elaine M. McMahon et al., 2010) | No exposures of interest |  |
| (Ming-Yue et al., 2006) | Not in English |  |
| (Mukhopadhyay and Kumar, 1999) | Full-text inaccessible |  |
| (Murberg and Bru, 2004) | No outcomes of interest |  |
| (Natvig et al., 1999) | No exposures of interest | Contacted (no response) |
| (Nguyen and Nguyen, 2019) | No exposures of interest |  |
| (Nonterah et al., 2015) | Excluded study population |  |
| (Okechukwu et al., 2022) | Excluded study population |  |
| (Park and Chung, 2014) | No exposures of interest | Contacted (no response) |
| (Rao, 2008) | Unpublished thesis |  |
| (Rodrigo et al., 2010) | Excluded study design |  |
| (Rodway et al., 2016) | Excluded study design |  |
| (Rodway et al., 2020) | Excluded study design |  |
| (Sandal et al., 2017) | No exposures of interest |  |
| (She et al., 2021) | No exposures of interest |  |
| (Singtakaew and Chaimongkol, 2021) | No exposures of interest |  |
| (Smyth and Banks, 2012) | Excluded study design |  |
| (Stoeber and Rambow, 2007) | Excluded study design |  |
| (Strydom et al., 2012) | Excluded study design |  |
| (Subotic et al., 2008) | Not in English |  |
| (Sund et al., 2003) | Excluded study design |  |
| (Tian et al., 2019) | Full-text inaccessible |  |
| (Tilton-Weaver et al., 2019) | Excluded study design |  |
| (Travers, 2014) | Unpublished thesis |  |
| (Trevethan et al., 2022) | Excluded study design |  |
| (Undheim and Sund, 2005) | No exposures of interest | Contacted (no response) |
| (Victor and Karunakaran, 2018) | No exposures of interest |  |
| (Walburg et al., 2014) | Not in English |  |
| Wang, 2003(Wang, 2003) | Not in English |  |
| (S. Wang et al., 2022) | No outcomes of interest |  |
| (X. Wang et al., 2022) | No exposures of interest |  |
| (Wen et al., 2022) | No exposures of interest |  |
| (Xiang et al., 2019) | No outcomes of interest |  |
| (Xin et al., 2022) | Excluded study population |  |
| (Yadusky-Holahan and Holahan, 1983) | Excluded study design |  |
| (Yan et al., 2018) | Excluded study design |  |
| (Yildirim et al., 2007) | No exposures of interest |  |
| (Yildirim, 2007) | Full-text inaccessible |  |
| (Ying et al., 2020) | No exposures of interest |  |
| (Zakari et al., 2009) | Not in English |  |
| (Zeng et al., 2020) | No outcomes of interest |  |
| (Zhang et al., 2014) | Not in English |  |
| (Zhang et al., 2022) | Excluded study population |  |

**References of excluded studies**

Addy, N.D., Agbozo, F., Runge-Ranzinger, S., Grys, P., 2021. Mental health difficulties, coping mechanisms and support systems among school-going adolescents in Ghana: A mixed-methods study. PLoS One 16. https://doi.org/10.1371/journal.pone.0250424

Ali, N.M., Nowshad, N.A., Mansoor, K.M., Ibnouf, R.A., Albehiery, R.M., Carrick, F.R., Abdulrahman, M., 2019. Perceived academic and psychological stress among adolescents in United Arab Emirates: Role of gender, age, depression, and high expectation of parents. Psychiatr Danub 31, S331–S337.

Anniko, M.K., Boersma, K., Tillfors, M., 2019. Sources of stress and worry in the development of stress-related mental health problems: A longitudinal investigation from early- to mid-adolescence. Anxiety Stress Coping 32, 155–167. https://doi.org/10.1080/10615806.2018.1549657

Arthur, L., 1990. Do or Die: Educational Pressure and Teenage Suicide in Japan.

Arun, P., Rohit, G., Chavan, B., 2017. Stress and suicidal ideation among adolescents having academic difficulty. Ind Psychiatry J 26, 64.

Askell-Williams, H., Lawson, M.J., 2015. Relationships between students’ mental health and their perspectives of life at school. Health Educ 115, 249–268. https://doi.org/10.1108/HE-02-2014-0007

Assana, S., Laohasiriwong, W., Rangseekajee, P., 2017. Quality of life, mental health and educational stress of high school students in the northeast of Thailand. Journal of Clinical and Diagnostic Research 11, VC01–VC06. https://doi.org/10.7860/JCDR/2017/29209.10429

Bashir, M.B.A., Albadawy, I.M.A.H., Cumber, S.N., 2019. Predictors and correlates of examination anxiety and depression among high school students taking the sudanese national board examination in khartoum state, sudan: A cross-sectional study. Pan African Medical Journal 33, 1–9. https://doi.org/10.11604/pamj.2019.33.69.17516

Beer, J., 1991. Depression, general anxiety, test anxiety, and rigidity of gifted junior high and high school children. Psychol Rep 69, 1128–1130.

Beidel, D.C., Turner, M.W., Trager, K.N., 1994. Test anxiety and childhood anxiety disorders in African American and white school children. J Anxiety Disord 8, 169–179. https://doi.org/10.1016/0887-6185(94)90014-0

Beidel, D.C., Turner, S., 1988. Comorbidity of test anxiety and other anxiety disorders in children. J Abnorm Child Psychol 16, 275–287.

Belhadj Kouider, E., Dupont, M., Lorenz, A., Petermann, F., 2015. Distributions of mental disorders and psychosocial pressures in children and adolescence of a psychiatric health care population. Psychiatr Prax 43, 265–272.

Bourion-Bédès, S., Rousseau, H., Batt, M., Tarquinio, P., Lebreuilly, R., Sorsana, C., Legrand, K., Tarquinio, C., Baumann, C., 2022. The effects of living and learning conditions on the health-related quality of life of children and adolescents during the COVID-19 lockdown in the French Grand Est region. BMC Public Health 22, 1–10. https://doi.org/10.1186/s12889-022-12941-3

Buddeberg-Fischer, B., Klaghofer, R., Leuthold, A., Buddeberg, C., 2000. School climate and psychological symptoms--correlations between school stress, sense of coherence and physical-psychological impairment in high school students. Psychother Psychosom Med Psychol 50, 222–229.

Rodrigo, C., Welgama, S., Gurusinghe, J., Wijeratne, T., Jayananda, G., Rajapakse, S., 2010. Symptoms of anxiety and depression in adolescent students; a perspective from Sri Lanka. Child Adolesc Psychiatry Ment Health 4, 10–12.

Chen, W., 2018. Academic Stress, Depression, and Social Support: A Comparison of Chinese Students in International Baccalaureate Programs and Key Schools. Dissertation Abstracts International Section A: Humanities and Social Sciences 79, No-Specified.

Chiou, P.N., Chen, Y.S., Lee, Y.C., 2006. Characteristics of adolescent suicide attempters admitted to an acute psychiatric ward in Taiwan. Journal of the Chinese Medical Association 69, 428–435. https://doi.org/10.1016/S1726-4901(09)70286-2

Cho, Y.J., 2020. Are Korean children free from suicide? Risk and protective factors within a transactional–ecological perspective. Journal of Child Health Care 24, 473–485. https://doi.org/10.1177/1367493519874969

Chusid, A., 2020. Stress in Adolescents: An Examination of the Context of High-Achieving American High Schools 1–112.

Deng, Y., Cherian, J., Khan, N.U.N., Kumari, K., Sial, M.S., Comite, U., Gavurova, B., Popp, J., 2022. Family and Academic Stress and Their Impact on Students’ Depression Level and Academic Performance. Front Psychiatry 13. https://doi.org/10.3389/fpsyt.2022.869337

Ding, X., 2002. Life events and depression of secondary school students. Chinese Mental Health Journal 16, 788–790.

Einstein, D.A., Lovibond, P.F., Gaston, J.E., 2000. Relationship Between Perfectionism and Emotional Symptoms in an Adolescent Sample. Aust J Psychol 52, 89–93. https://doi.org/10.1080/00049530008255373

Elmelid, A., Stickley, A., Lindblad, F., Schwab-Stone, M., Henrich, C.C., Ruchkin, V., 2015. Depressive symptoms, anxiety and academic motivation in youth: Do schools and families make a difference? J Adolesc 45, 174–182. https://doi.org/10.1016/j.adolescence.2015.08.003

Ertanir, B., Kassis, W., Garrote, A., 2021. Longitudinal changes in swiss adolescent’s mental health outcomes from before and during the covid-19 pandemic. Int J Environ Res Public Health 18. https://doi.org/10.3390/ijerph182312734

Fernández-Sogorb, A., Sanmartín, R., Vicent, M., Gonzálvez, C., 2021. Identifying profiles of anxiety in late childhood and exploring their relationship with school-based distress. Int J Environ Res Public Health 18, 1–15. https://doi.org/10.3390/ijerph18030948

Feurer, D.P., Andrews, J.J.W., 2009. School-related stress and depression in adolescents with and without learning disabilities: An exploratory study. Alberta Journal of Educational Research 55, 92–108.

Friis, R.H., Wittchen, H.U., Pfister, H., Lieb, R., 2002. Life events and changes in the course of depression in young adults. European Psychiatry 17, 241–253. https://doi.org/10.1016/S0924-9338(02)00682-X

Giota, J., Gustafsson, J.E., 2017. Perceived Demands of Schooling, Stress and Mental Health: Changes from Grade 6 to Grade 9 as a Function of Gender and Cognitive Ability. Stress and Health 33, 253–266. https://doi.org/10.1002/smi.2693

Govorova, E., Benítez, I., Muñiz, J., 2020. How Schools Affect Student Well-Being: A Cross-Cultural Approach in 35 OECD Countries. Front Psychol 11, 1–14. https://doi.org/10.3389/fpsyg.2020.00431

Guiping, W., Huichang, C., 2001. Coping style of adolescents under academic stress their locus of control, self-esteem and mental health. Chinese Mental Health Journal.

Högberg, B., Lindgren, J., Johansson, K., Strandh, M., Petersen, S., 2021. Consequences of school grading systems on adolescent health: evidence from a Swedish school reform. Journal of Education Policy 36, 84–106. https://doi.org/10.1080/02680939.2019.1686540

Högberg, B., Strandh, M., Petersen, S., Johansson, K., 2019. Education system stratification and health complaints among school-aged children. Soc Sci Med 220, 159–166. https://doi.org/10.1016/j.socscimed.2018.11.007

Hou, J., Chen, Z., 2016. The trajectories of adolescent depressive symptoms: Identifying latent subgroups and risk factors. Acta Psychologica Sinica 48, 957.

Huang, J.P., Xia, W., Sun, C.H., Zhang, H.Y., Wu, L.J., 2009. Psychological distress and its correlates in Chinese adolescents. Australian and New Zealand Journal of Psychiatry 43, 674–681. https://doi.org/10.1080/00048670902970817

Ishizu, K., 2017. Contingent self-worth moderates the relationship between school stressors and psychological stress responses. J Adolesc 56, 113–117. https://doi.org/10.1016/j.adolescence.2017.02.008

Jerrim, J., 2021. National tests and the wellbeing of primary school pupils: new evidence from the UK. Assess Educ 28, 507–544. https://doi.org/10.1080/0969594X.2021.1929829

Julien, F., 2020. Is ambition consequential? Exploring the association between depressive symptomatology and the educational expectation trajectories and achievements of immigrant youth. The University of Alabama.

Kaya, A., 2004. Test Anxiety and Psychopathology in Fifth-Grade Students in Turkey. International Journal of Educational Reform 13, 19–26. https://doi.org/10.1177/105678790401300102

Khanehheshi, A., Basavarajappa, 2012. A Comparative Study of the Academic Stress and Depression among High School Girl and Boy Students. i-manager’s Journal on Educational Psychology 6, 11–20. https://doi.org/10.26634/jpsy.6.1.1878

Khan, A., Sriyanto, S., Baranovich, D.L., Tahir, L.M., Panatik, S.A., Sasmoko, S., Indrianti, Y., Hamid, M.A.A., Lukman, F., Van, N.T., Jabor, M.K., 2022. The relationship between positive mental health, academic stress and suicide ideation among Malaysian adolescents residing in Johor Bahru. Current Psychology. https://doi.org/10.1007/s12144-022-02885-7

Kim, D., Kwon, H.J., Ha, M., Lim, M.H., Kim, K.M., 2021. Network analysis for the symptom of depression with Children’s Depression Inventory in a large sample of school-aged children. J Affect Disord 281, 256–263. https://doi.org/10.1016/j.jad.2020.12.002

Kim, K.M., 2021. What makes adolescents psychologically distressed? Life events as risk factors for depression and suicide. Eur Child Adolesc Psychiatry 30, 359–367. https://doi.org/10.1007/s00787-020-01520-9

Kim, Y.J., Moon, S.S., Lee, J.H., Kim, J.K., 2018. Risk factors and mediators of suicidal ideation among Korean adolescents. Crisis 39, 4–12. https://doi.org/10.1027/0227-5910/a000438

Koyama, A., Matsushita, M., Ushijima, H., Jono, T., Ikeda, M., 2014. Association between depression, examination-related stressors, and sense of coherence: The ronin-sei study. Psychiatry Clin Neurosci 68, 441–447. https://doi.org/10.1111/pcn.12146

Kwon, S., Yang, M.-J., Yoo, J.-H., Kim, L.-S., 2015. Big Data Analysis of Counseling Cases for Youth At Risk of Suicide. 2Nd International Conference on Education and Social Sciences (Intcess’15) 925–930.

Lazaratou, H., Dikeos, D.G., Anagnostopoulos, D.C., Soldatos, C.R., 2010. Depressive symptomatology in high school students: The role of age, gender and academic pressure. Community Ment Health J 46, 289–295. https://doi.org/10.1007/s10597-010-9296-2

Lee, M.T.Y., Wong, B.P., Chow, B.W.-Y., McBride-Chang, C., 2006. Predictors of Suicide Ideation and Depression in Hong Kong Adolescents: Perceptions of Academic and Family Climates. Suicide Life Threat Behav 36, 82–96. https://doi.org/10.1521/suli.2006.36.1.82

Lee, M.Y., Cho, S., Huy, V.N., Lee, S.M., 2021. A multilevel analysis of change in emotional exhaustion during high school: Focusing on the individual and contextual factors. Current Psychology 40, 5648–5657. https://doi.org/10.1007/s12144-020-00869-z

Lee, W.K., 2016. Psychological characteristics of self-harming behavior in Korean adolescents. Asian J Psychiatr 23, 119–124. https://doi.org/10.1016/j.ajp.2016.07.013

Li, K., Guang, Y., Ren, L., Zhan, X., Tan, X., Luo, X., Feng, Z., 2021. Network analysis of the relationship between negative life events and depressive symptoms in the left-behind children. BMC Psychiatry 21. https://doi.org/10.1186/s12888-021-03445-2

Lin, H.J., Yusoff, M.S.B., 2013. Psychological distress, sources of stress and coping strategy in high school students. International Medical Journal 20, 672–676.

Little, S.A., Garber, J., 2004. Interpersonal and Achievement Orientations and Specific Stressors Predict Depressive and Aggressive Symptoms. J Adolesc Res 19, 63–84. https://doi.org/10.1177/0743558403258121

Luo, Y., Cui, Z., Zou, P., Wang, K., Lin, Z., He, J., Wang, J., 2020. Mental health problems and associated factors in chinese high school students in henan province: a cross-sectional study. Int J Environ Res Public Health 17, 1–13. https://doi.org/10.3390/ijerph17165944

Luthar, S.S., Ebbert, A.M., Kumar, N.L., 2021. Risk and resilience during COVID-19: A new study in the Zigler paradigm of developmental science. Dev Psychopathol 33, 565–580. https://doi.org/10.1017/S0954579420001388

Mardomingo Sanz, M., Catalina Zamora, M., 1992. Attempted suicide in childhood and adolescence: Risk factors. An Esp Pediatr 36, 429–432.

Martinez, G., Bámaca-Colbert, M., 2019. A Reciprocal and Longitudinal Investigation of Peer and School Stressors and Depressive Symptoms Among Mexican-Origin Adolescent Females. J Youth Adolesc 48, 2125–2140.

Masi, G., Sbrana, B., Poli, P., Tomaiuolo, F., Favilla, L., Marcheschi, M., 2000. Depression and school functioning in non-referred adolescents: A pilot study. Child Psychiatry Hum Dev 30, 161–171. https://doi.org/10.1023/A:1021395504617

McMahon, E. M., Reulbach, U., Corcoran, P., Keeley, H.S., Perry, I.J., Arensman, E., 2010. Factors associated with deliberate self-harm among Irish adolescents. Psychol Med 40, 1811–1819. https://doi.org/10.1017/S0033291709992145

McMahon, Elaine M., Reulbach, U., Keeley, H., Perry, I.J., Arensman, E., 2010. Bullying victimisation, self harm and associated factors in Irish adolescent boys. Soc Sci Med 71, 1300–1307. https://doi.org/10.1016/j.socscimed.2010.06.034

Ming-Yue, S., Jin-Tao, W., Ren-Gang, L., 2006. Investigation and analysis of influential factors on junior adolescent depression. Chinese Mental Health Journal 20, 451–456.

Mukhopadhyay, P., Kumar, J., 1999. Academic pressure: It’s impact on the mental health of children. Social Science International 15, 39–45.

Murberg, T.A., Bru, E., 2004. School-related stress and psychosomatic symptoms among norwegian adolescents. Sch Psychol Int 25, 317–332. https://doi.org/10.1177/0143034304046904

Natvig, G.K., Albrektsen, G., Anderssen, N., 1999. Among School Adolescents. Journal of School Health 69, 362–368.

Nguyen, H.T.M., Nguyen, N.T.A., 2019. Influence of school factors on emotional disorder risk in Vietnamese middle school students. Health Psychol Rep 7, 316–324. https://doi.org/10.5114/hpr.2019.88664

Nonterah, C.W., Hahn, N.C., Utsey, S.O., Hook, J.N., Abrams, J.A., Hubbard, R.R., Opare-Henako, A., 2015. Fear of Negative Evaluation as a Mediator of the Relation between Academic Stress, Anxiety and Depression in a Sample of Ghanaian College Students. Psychol Dev Soc J 27, 125–142. https://doi.org/10.1177/0971333614564747

Okechukwu, F.O., Ogba, K.T.U., Nwufo, J.I., Ogba, M.O., Onyekachi, B.N., Nwanosike, C.I., Onyishi, A.B., 2022. Academic stress and suicidal ideation: moderating roles of coping style and resilience. BMC Psychiatry 22. https://doi.org/10.1186/s12888-022-04063-2

Park, J.Y., Chung, I.J., 2014. Adolescent suicide triggered by problems at school in Korea: Analyses focusing on depression, suicidal ideation, plan, and attempts as four dimensions of suicide. Child Indic Res 7, 75–88. https://doi.org/10.1007/s12187-013-9197-3

Rao, A., 2008. Academic stress and adolescent distress: The experiences of 12th standard students in Chennai, India. The University of Arizona.

Rodway, C., Tham, S.-G., Ibrahim, S., Turnbull, P., Kapur, N., Appleby, L., 2020. Children and young people who die by suicide: childhood-related antecedents, gender differences and service contact. BJPsych Open 6, 1–9. https://doi.org/10.1192/bjo.2020.33

Rodway, C., Tham, S.G., Ibrahim, S., Turnbull, P., Windfuhr, K., Shaw, J., Kapur, N., Appleby, L., 2016. Suicide in children and young people in England: a consecutive case series. Lancet Psychiatry 3, 751–759. https://doi.org/10.1016/S2215-0366(16)30094-3

Sandal, R., Goel, N., Sharma, M., Bakshi, R., Singh, N., Kumar, D., 2017. Prevalence of depression, anxiety and stress among school going adolescent in Chandigarh. J Family Med Prim Care 6, 405. https://doi.org/10.4103/2249-4863.219988

She, R., Wong, K., Lin, J., Leung, K., Zhang, Y., Yang, X., 2021. How COVID-19 stress related to schooling and online learning affects adolescent depression and Internet gaming disorder: Testing Conservation of Resources theory with sex difference. J Behav Addict 10, 953–966. https://doi.org/10.1556/2006.2021.00069

Singtakaew, A., Chaimongkol, N., 2021. Deliberate self-harm among adolescents: A structural equation modelling analysis. Int J Ment Health Nurs 30, 1649–1663. https://doi.org/10.1111/inm.12918

Smyth, E., Banks, J., 2012. High stakes testing and student perspectives on teaching and learning in the Republic of Ireland. Educ Assess Eval Account 24, 283–306. https://doi.org/10.1007/s11092-012-9154-6

Stoeber, J., Rambow, A., 2007. Perfectionism in adolescent school students: Relations with motivation, achievement, and well-being. Pers Individ Dif 42, 1379–1389. https://doi.org/10.1016/j.paid.2006.10.015

Strydom, M.A.A., Pretorius, P.J., Joubert, G., 2012. Depression and anxiety among Grade 11 and 12 learners attending schools in central Bloemfontein. South African Journal of Psychiatry 18, 84–88. https://doi.org/10.7196/SAJP.356

Subotic, S., Brajsa-Zganec, A., Merkas, M., 2008. The relations of school stress, perceived incompetence and locus of control to suicidality in adolescents. Psihologijske Teme 17, 111–131.

Sund, A.M., Larsson, B., Wichstrøm, L., 2003. Psychosocial correlates of depressive symptoms among 12-14-year-old Norwegian adolescents. J Child Psychol Psychiatry 44, 588–597. https://doi.org/10.1111/1469-7610.00147

Tian, L., Jiang, S., Huebner, E., 2019. The big two personality traits and adolescents’ complete mental health: The mediation role of perceived school stress. School Psychology 34, 32.

Tilton-Weaver, L., Marshall, S.K., Svensson, Y., 2019. Depressive symptoms and non-suicidal self-injury during adolescence: Latent patterns of short-term stability and change. J Adolesc 75, 163–174. https://doi.org/10.1016/j.adolescence.2019.07.013

Travers, L., 2014. The hidden costs of success: A mixed methods approach to examining achievement pressures in affluent youth. Loyola University Chicago.

Trevethan, M., Jain, A.T., Shatiyaseelan, A., Luebbe, A.M., Raval, V. V., 2022. A longitudinal examination of the relation between academic stress and anxiety symptoms among adolescents in India: The role of physiological hyperarousal and social acceptance. International Journal of Psychology 57, 401–410. https://doi.org/10.1002/ijop.12825

Undheim, A.M., Sund, A.M., 2005. School factors and the emergence of depressive symptoms among young Norwegian adolescents. Eur Child Adolesc Psychiatry 14, 446–453. https://doi.org/10.1007/s00787-005-0496-1

Victor, L.M., Karunakaran, U., 2018. Depression and Associated Factors Among Students Studying in Higher Secondary Schools in North Kerala. J Evol Med Dent Sci 7, 3894–3899. https://doi.org/10.14260/jemds/2018/871

Walburg, V., Zakari, S., Chabrol, H., 2014. Role of academic burnout in suicidal ideas among adolescents. Neuropsychiatr Enfance Adolesc 62, 28–32.

Wang, J., 2003. A Study on the Influential Factors on Anxiety of Secondary School Students. Chinese Journal of Clinical Psychology 11, 164–166.

Wang, S., Shi, X., Wang, Z., Li, Zihan, Wang, A., Hu, X., Li, Zhipeng, 2022. Joint developmental trajectories and correlates of internalizing and externalizing problems among Chinese adolescents. J Clin Psychol. https://doi.org/10.1002/jclp.23436

Wang, X., Zhang, J., Sun, X., Zhang, L., 2022. Stress mindset and mental health status among Chinese high school students: The mediating role of exam stress appraisals. Psych J. https://doi.org/10.1002/pchj.563

Wen, F., Meng, Y., Liu, K., Xia, J., Li, H., Qi, H., Meng, K., Zhang, L., 2022. Depression among schoolchildren and adolescents aged 9–17 years during the outbreak of COVID‑19 in Beijing: a cross-sectional online survey. Psychol Health Med. https://doi.org/10.1080/13548506.2022.2058029

Xiang, Z., Tan, S., Kang, Q., Zhang, B., Zhu, L., 2019. Longitudinal Effects of Examination Stress on Psychological Well-Being and a Possible Mediating Role of Self-Esteem in Chinese High School Students. J Happiness Stud 20, 283–305. https://doi.org/10.1007/s10902-017-9948-9

Xin, M., Petrovic, J., Zhang, L., Böke, B.N., Yang, X., Xue, Y., 2022. Various Types of Negative Life Events Among Youth Predict Suicidal Ideation: A Cross-Sectional Study Based on Gender Perspective. Am J Mens Health 16. https://doi.org/10.1177/15579883221110352

Yadusky-Holahan, M., Holahan, W., 1983. The Effect of Academic Stress Upon the Anxiety and Depression Levels of Gifted High School Students. Gifted Child Quarterly 27, 42–46. https://doi.org/10.1177/001698628302700107

Yan, Y.W., Lin, R.M., Su, Y.K., Liu, M.Y., 2018. The relationship between adolescent academic stress and sleep quality: A multiple mediation model. Soc Behav Pers 46, 63–77. https://doi.org/10.2224/sbp.6530

Yildirim, I., 2007. Depression, test anxiety and social support among Turkish students preparing for the university entrance examination. Eurasian journal of educational research 29.

Yildirim, I., Ergene, T., Munir, K., 2007. High rates of depressive symptoms among senior high school students preparing for national university entrance examination in Turkey. Int J School Disaffect 4, 35.

Ying, J., You, J., Guo, J., 2020. The protective effects of youth assets on the associations among academic stress, regulatory emotional self-efficacy, and suicidal risk: A moderated mediation model. Child Youth Serv Rev 119, 105660. https://doi.org/10.1016/j.childyouth.2020.105660

Zakari, S., Walburg, V., Chabrol, H., 2009. Burnout among French High-School Students. Psychology of Burnout 295–302.

Zeng, H., Zheng, Z., Wang, P., 2020. Characteristics of Psychological Crisis and its Risk Factors Among Adolescents in China. J Child Fam Stud 29, 2443–2452. https://doi.org/10.1007/s10826-020-01773-7

Zhang, D., Chen, L., Yin, D., Miao, J., Sun, Y., 2014. Study on the correlation among adolescents’ family function, negative life events stress amount and suicide ideation. Journal of Hygiene Research 43, 581–585.

Zhang, X., Gao, F., Kang, Z., Zhou, H., Zhang, J., Li, J., Yan, J., Wang, J., Liu, H., Wu, Q., Liu, B., 2022. Perceived Academic Stress and Depression: The Mediation Role of Mobile Phone Addiction and Sleep Quality. Front Public Health 10. https://doi.org/10.3389/fpubh.2022.760387

**Additional tables**

Table S1. Quality assessment of included studies using the Mixed Methods Appraisal Tool.

| Citation | Representative sample | Appropriate measures | Complete outcome data | Confounders accounted for | Exposure occurred as intended |
| --- | --- | --- | --- | --- | --- |
| Ang & Huan, 2006 | CT | Y | CT | N | Y |
| Bersia et al., 2022 | Y | N | CT | Y | N |
| Blackburn et al., 2021 | Y | Y | Y | Y | Y |
| Carbone, Holzer & Vaughn, 2019 | Y | Y | Y | Y | Y |
| Chyu & Chen, 2022 | N | N | Y | N | Y |
| Cosma et al., 2020 | Y | N | CT | Y | Y |
| Deb, Strodl & Sun, 2015 | CT | N | CT | N | Y |
| Eriksson & Sellström, 2010 | CT | N | Y | Y | Y |
| Fu, Ren & Liang, 2022 | Y | N | CT | N | Y |
| Guo et al., 2014 | CT | Y | Y | Y | Y |
| Hansen & Lang, 2011 | Y | Y | Y | Y | Y |
| Hanspal et al., 2019 | CT | N | CT | N | Y |
| Haugan, Frostad & Mjaavatn, 2021 | Y | N | Y | N | Y |
| Hawton et al., 2003 | Y | Y | Y | Y | Y |
| Ho, Nguyen & Nguyen, 2022 | CT | Y | CT | N | Y |
| Hodge, McCormick & Elliot, 1997 | CT | Y | CT | Y | Y |
| Högberg, Strandh & Haquist, 2020 | Y | N | CT | Y | Y |
| Högberg, 2021 | Y | N | Y | Y | Y |
| Hosseinkhani et al., 2020 | CT | Y | CT | N | Y |
| Huang & Chen, 2015 | Y | Y | Y | N | Y |
| Izuan et al., 2018 | Y | Y | CT | N | Y |
| Jayanthi, Thirunavukarasu & Raajkumar, 2015 | CT | Y | CT | N | Y |
| Jiang, Ren, Jiang & Wang, 2021/Li, Zhang & Cheng, 2022 | Y | N | CT | N | Y |
| Kaman et al., 2021 | CT | N | Y | N | Y |
| Lahti et al., 2007 | Y | Y | Y | Y | Y |
| Liu & Lu, 2011 | CT | Y | CT | N | Y |
| Locker & Cropley, 2004 | CT | Y | N | N | Y |
| Long, Zucca & Sweeting, 2020 | Y | N | Y | Y | Y |
| Lönnfjord & Hagquist, 2020 | Y | N | CT | N | Y |
| Ma, Siu & Tse, 2018 | Y | Y | CT | Y | Y |
| Masood et al., 2018 | CT | Y | CT | Y | Y |
| Matsubayashi, Uedi & Yoshikawa, 2016 | Y | Y | Y | Y | Y |
| McCleary et al., 1991 | Y | Y | Y | Y | Y |
| Moksnes et al., 2016 | CT | Y | CT | N | Y |
| Nguyen et al., 2013 | Y | Y | CT | Y | Y |
| Nygren & Hagquist, 2017 | CT | N | Y | Y | Y |
| Quach et al., 2015 | CT | Y | CT | N | Y |
| Redmond, Garcia-Moya, Moreno, et al., 2022 | Y | N | CT | Y | Y |
| Ringdal et al., 2020 | Y | Y | CT | Y | Y |
| Shang et al., 2014 | Y | Y | CT | Y | Y |
| Slaunwhite et al., 2019 | Y | Y | Y | Y | Y |
| Song, Fu & Wang, 2019 | CT | Y | Y | N | Y |
| Song et al., 2020 | Y | Y | CT | Y | Y |
| Sonmark et al., 2016 | Y | N | Y | N | Y |
| Spiller et al., 2020 | Y | Y | Y | Y | Y |
| Sun & Hui, 2007 | Y | Y | CT | Y | Y |
| Torsheim, Aaroe & Wold, 2003 | CT | N | N | N | Y |
| Torsheim & Wold, 2001 | Y | N | Y | N | Y |
| Wahab et al., 2013 | Y | Y | CT | N | Y |
| Wen et al., 2020 | Y | N | CT | Y | Y |
| Zhang et al., 2013 | CT | Y | CT | N | Y |
| Zhang et al., 2019 | Y | N | Y | Y | Y |

Y = Yes. N = No. CT = Cannot tell.

Table S2. Summary of academic pressure measures used in the included studies.

| **Academic pressure measure** | **Brief description** | **Items** | **Example items** |
| --- | --- | --- | --- |
| Single items | | | |
| HBSC single schoolwork item | Single item on how stressed or pressured respondents feel by their schoolwork, used across HBSC survey years. Responses via a four-point Likert scale. | 1 | “How pressured do you feel by the schoolwork you have to do?” |
| HBSC single school demands item | Single item regarding high teacher demands. Responses via a five-point Likert scale. | 1 | “What characterised schoolwork in your class: Too-high demands from teachers?” |
| Parental pressure single item | Single item regarding parental pressure for good exam performance. | 1 | Not stated |
| Single academic pressure item | Single item regarding stress and pressure from school. Responses via a five-point Likert scale. | 1 | “In the past 12 months, how often did you feel unhappy because of stress/pressure from school?” |
| Single academic pressure item | Single item on the level of academic pressure experienced by respondents. Responses via a five-point Likert scale. | 1 | Not stated |
| Single academic pressure item | Single item on the level of stress experienced by respondents due to academic pressure from parents. Responses via a five-point Likert scale. | 1 | “How stressed do you feel about your parents’ educational expectations?” |
| Single exam pressure item | Single item regarding perceived exam pressure. Responses via a four-point Likert scale. | 1 | “In my school it’s important to pass exams” |
| Scales | | | |
| 3 item HBSC scale | 3-item HBSC academic stress subscale administered across different survey years. Responses are on a five-point scale from strongly disagree (0) to strongly agree (4), with sum score calculated from 0 to 12. Items vary slightly across survey years, but generally concern stress or pressure from schoolwork, difficulty with schoolwork and having too much schoolwork. Unclear if reliability testing or validity assessment has taken place. | 3 | "I have too much schoolwork”  “I am stressed by schoolwork”  “I find schoolwork tiring.” |
| 4 items on Examination Expectations | Factor identified from 27 items related to student's perceptions of support, self-concept, and exam expectations. Features four items relating to perceptions of exams, parental academic pressure, and perceived importance of high exam results for future plans. | 4 | “How important & worthwhile for your future life plans do you rate achieving a good High School Certificate result?”  “What are your parents’ expectations about your High School Certificate result?” |
| 4 items on stress regarding academic achievement | Items focused on stress from homework, achievement, exams and learning, constructed for the studies by Jiang, Ren, Jiang & Wang, (2021) and Li, Zhang & Cheng (2022). Responses via a four-point Likert scale. | 4 | “I am afraid of obtaining a bad grade”  “I feel stress from too much homework”  “I am stressed out from the burden of exams” |
| 17 items on stress from academic expectations | Unnamed scale constructed for Chyu & Chen (2022) study. Features 17 items across four different subscales: stress from parents, stress from teachers, stress from self, and excessive demands. Responses via a five-point Likert scale. | 17 | “I blame myself if I cannot meet my parents’ academic expectations”  “If I have a poor performance in school, I think my teachers are disappointed in me”  “If I cannot meet my own expectations, I am not good enough” |
| Academic stress questionnaire | Chinese measure constructed for the Liu & Lu study (2012). Three items from the homework subscale focus on study pressure and burden. Responses via a five-point Likert scale. | 3 | “To finish my homework makes me feel pressure.”  “My homework is a burden for me.”  “I have a lot of homework to do.” |
| Adapted schoolwork pressure scale | Four items identified from a previous study that measured school-related stress (Murberg & Bru, 2004), focused on demanding schoolwork, a lack of help with schoolwork and concerns with school performance. Responses via a five-point Likert scale. | 4 | “You think that schoolwork has been too demanding”  “You have been concerned about schoolwork you have not done or that you have not done well.” |
| AESI | Validated scale assessing high academic expectations from parents and teachers, and high self-expectations. Responses via a five-point Likert scale. | 9 | “I feel stressed when I know my parents are disappointed in my exam grades.”  “I feel lousy when I cannot live up to my teacher’s expectations.” “When I fail to live up to my own expectations, I feel I am not good enough. “ “When I do not do as well as I could have in an examination or test, I feel stressed.” |
| Chinese Academic Pressure Scale | A Chinese Academic Pressure Scale purposively constructed for the Sun & Hui (2007) study to measure academic stress. Items focus on the importance of good grades, studying effort and competitiveness between peers. | 5 | “It is important to get good grades in our studies”  “Working hard is necessary in getting good grades”  “I feel a sense of competitiveness in my class” |
| Effort-Reward Imbalance for Learning Scale | Chinese scale that estimates effort applied in learning, the level of rewards and positive appraisal for the effort applied and the level of over-investment. An effort-reward imbalance ratio is calculated through a comparison of scores on the effort and reward subscales., with a ratio higher than 1 implying an imbalance and high academic stress. The scale has been validated in both Japan and China. | 10 | “At school, I am often praised by my teachers and parents.” “Because of my efforts and achievements, I will have a bright future.” “When I go to sleep at night, I still think about studying.” |
| ERI-S | Validated questionnaire measuring effort at school, including schoolwork and parental expectations, "reward" addressing academic performance and study prospects, and academic over-commitment. An effort-reward imbalance ratio is calculated through a comparison of scores on the effort and reward subscales, with a ratio higher than 1 implying an imbalance and high academic stress. Responses via a five-point Likert scale. | 19 | Effort (5 items):  “I have too much schoolwork.”  “My parents expect too much of me at school.”  Reward (11 items):  “When I need help, I can get it from my teacher.”  “Most of my schoolmates are kind and helpful.”  Over-commitment (3 items):  “Studying rarely leaves my mind; it is still on my mind when I go to bed.” |
| ESSA | A 16-item validated scale assessing academic stress across 5 domains: pressure from study, workload, worry about grades, self-expectation, and despondency. Responses via a five-point Likert scale. | 16 | Pressure from study (4 items): “I feel a lot of pressure in my daily studying.”  Workload (3 items): “I feel that there are too many tests/exams in the school.”  Worry about grades (3 items): “I feel that I have disappointed my teacher when my test or exam results are not ideal.”  Self-expectation (3 items): “When I fail to live up to my own expectations, I feel I am not good enough.”  Despondency (3 items): “I am very dissatisfied with my academic grades.” |
| HBSC Academic Stress subscale + High Academic Expectations subscale | Composite school-related stress measure comprising items from the HBSC Academic Stress subscale and the High Academic Expectations subscale (Samdal, Wold & Torsheim, 1998). Items focus on stress from academic expectations from teachers and parents, and from schoolwork demands. Responses via a five-point Likert scale. | 5 | "I have too much schoolwork”  “I find schoolwork tiring"  “Teachers expect too much of me in school” |
| HPE | Four-item scale assessing parental academic pressure and expectations. Responses via a five-point Likert scale. | 4 | "My parents expect me to be one of the best students in my class”  "I feel my parents will be disappointed if I don't get very high grades" |
| Perception about Stress of Adolescents | Measure constructed for the study by Deb, Strodl & Sun (2015). Scale features items on the level and sources of academic pressure. Respondents answer either “yes” or “no” to each item. | Unclear | “Do you feel stressed because of academic pressure?” |
| Subscales | | | |
| 3SQ (Academic- related Stressor subscale) | Validated Malay questionnaire designed to perceive sources of stress among adolescents across 6 different domains. The academic related stressor subscale comprises 10 items focused on stress experienced by exams, high workload, high self-expectations, competitive school environment, and difficulties with schoolwork. | 10 | Does it cause you to feel stressful?:  “Examinations.”  “Too much content to learn.”  “Lack of time to do revision.”  “High self-expectation.”  “Competitive learning environment. “ |
| ASLEC  (Study pressure subscale) | Subscale of a validated Chinese measure of negative life events. Items reflect the frequency of negative academic stressors and events in the past 12 months. Negative academic events include exam failure, high workload, and high academic pressure. Respondents indicate the perceived stressfulness of each event through a 5-point Likert scale. | 4 | Experienced:  “Examination failure” “Academic pressure” |
| ASQ-N (school performance subscale) | Norwegian version of the validated Adolescent Stress Questionnaire featuring 9 separate subscales. Academic pressure is measured through items that comprise the "stress of school performance" subscale. Items focus on high school demands and teacher expectations. Items are rated on a five-point Likert scale. | 5 | “Having to study things you don’t understand” “Teachers expecting too much from you”  “Having to concentrate too long during school hours” |
| IAASQ (Future Concerns, Academic Competition, and Stress of Parent Involvement subscales) | A validated 57-item scale assessing academic stress across 9 domains, with 3 subscales relevant to the concept of academic pressure: future concerns, academic competition, and parental involvement. Responses via a five-point Likert scale. | 57 | Future concerns (6 items):  “Worry about failing the university entrance exam.”  “Worry about the future because unemployed people are in society.”  Academic competition (5 items):  “Worry about the behaviour of your friends and peers, in the case of educational failure.”  “Worry about the behaviour of teachers, deputies, and school principals, in the case of educational failure.”  Parent involvement (4 items):  “Parent´s blame you for your low grades.”  “Parent´s compare your grades with your friends or other family members.” |
| IPI (Academic Pressure subscale) | Subscale of the IPI used to assess respondents’ perceptions of parental academic expectations and pressure to achieve. Responses via a five-point Likert scale. | 13 | “School would be more pleasant if my parents were not as strict.”  “When it comes to school, my parents expect the impossible.”  “My parents are pleased only when I get 100% on tests. “ |

AESI = Academic Expectations Stress Inventory. ASLEC = Adolescent Self-Rating Life Events Checklist. ASQ-N = Norwegian version of the Adolescent Stress Questionnaire. ERI-S = Effort–Reward Imbalance at School. ESSA = Educational Stress Scale for Adolescents. HBSC = Health Behaviour in School-aged Children. HPE = High Parental Expectations. IAASQ = Iranian Adolescents Academic Stress Questionnaire. IPI = Inventory of Parental Influence. 3SQ = Secondary School Stressor Questionnaire.
